# Supplementary material for: Pre-Existing Cardiovascular Conditions as Clinical Predictors of Myocarditis Reporting with Immune Checkpoint Inhibitors: A VigiBase Study
Source: MDPI journal article supplement (doi:10.3390/cancers12113480), 2020-11-23
Supplement: s1 [file s1]

# Supplementary materials: Pre-Existing Cardiovascular Conditions as Clinical Predictors of Myocarditis Reporting with Immune Checkpoint Inhibitors: A Vigibase Study

Roberta Nosedà, Lorenzo Ruinelli, Linda C. van der Gaag and Alessandro Ceschi

**Table S1.** Search criteria for safety report selection in Vigibase.

| <b>A) ICI indication</b>                                                                                                                                                                                                                                                                                                                                                                                                                                                                                                                                                                                                                             |                               |
|------------------------------------------------------------------------------------------------------------------------------------------------------------------------------------------------------------------------------------------------------------------------------------------------------------------------------------------------------------------------------------------------------------------------------------------------------------------------------------------------------------------------------------------------------------------------------------------------------------------------------------------------------|-------------------------------|
| Melanoma → including the following (as coded according to the MedDRA classification system):                                                                                                                                                                                                                                                                                                                                                                                                                                                                                                                                                         |                               |
|                                                                                                                                                                                                                                                                                                                                                                                                                                                                                                                                                                                                                                                      | Melanoma                      |
|                                                                                                                                                                                                                                                                                                                                                                                                                                                                                                                                                                                                                                                      | Malignant melanoma            |
|                                                                                                                                                                                                                                                                                                                                                                                                                                                                                                                                                                                                                                                      | Metastatic malignant melanoma |
|                                                                                                                                                                                                                                                                                                                                                                                                                                                                                                                                                                                                                                                      | Metastatic melanoma           |
| NSCLC → including the following (as coded according to the MedDRA classification system):                                                                                                                                                                                                                                                                                                                                                                                                                                                                                                                                                            |                               |
|                                                                                                                                                                                                                                                                                                                                                                                                                                                                                                                                                                                                                                                      | NSCLC                         |
|                                                                                                                                                                                                                                                                                                                                                                                                                                                                                                                                                                                                                                                      | NSCLC recurrent               |
|                                                                                                                                                                                                                                                                                                                                                                                                                                                                                                                                                                                                                                                      | NSCLC metastatic              |
| <b>B) ICI-related ADRs that led to safety report exclusion from the control group</b>                                                                                                                                                                                                                                                                                                                                                                                                                                                                                                                                                                |                               |
| <ul style="list-style-type: none"> <li>ICI-related ADR(s) at the CV system included in the MedDRA SOC “cardiac disorders” and “vascular disorders”, and/or</li> <li>ICI-related ADR(s) representing risk factors for myocarditis (and for CV toxicity in general), listed in the MedDRA SMQs “hyperglycaemia/new onset diabetes mellitus”, “ischaemic heart disease”, “dyslipidaemia”, “hypertension”, “chronic kidney disease”, or reported as (MedDRA PTs) “obesity” and “tobacco user”, and/or</li> <li>ICI-related “transplant”, “immunosuppression”, “infection in an immunocompromised host”, or “autoimmune disorder” (MedDRA PTs)</li> </ul> |                               |
| <p><i>Abbreviations:</i> ICI, immune checkpoint inhibitor; MedDRA, Medical Dictionary for Regulatory Activities; NSCLC, non-small cell lung cancer; CV, cardiovascular; SOC, system organ class; SMQ, standardized MedDRA query.</p>                                                                                                                                                                                                                                                                                                                                                                                                                 |                               |

**Table S2.** Counts of the case-control pairs on the restricted study group with respect to the pre-existence of cardiovascular risk factors and/or cardiovascular diseases in.

|          |                                       | CASES                              |                                       |        |
|----------|---------------------------------------|------------------------------------|---------------------------------------|--------|
|          |                                       | With concomitant<br>drugs of ATC C | Without concomitant<br>drugs of ATC C | Totals |
| CONTROLS | With concomitant<br>drugs of ATC C    | 2                                  | 7                                     | 9      |
|          | Without concomitant<br>drugs of ATC C | 18                                 | 62                                    | 80     |
|          | Totals                                | 20                                 | 69                                    | 89     |

Abbreviations: ATC, anatomical, therapeutic, chemical; C, cardiovascular system.
